# Supplementary material for: Synergistic manifestation of band and scattering engineering in the single aliovalent Sb alloyed anharmonic SnTe alloy in concurrence with rule of parsimony
Source: Royal Society of Chemistry journal article supplement (doi:10.1039/d1ma00749a), 2021-01-01
Supplement: d1ma00749a1.pdf [file d1ma00749a1.pdf]

## Synergistic manifestation of band and scattering engineering in aliovalent alloyed anharmonic SnTe alloy

Ranita Basu<sup>a\*1</sup>, Srikanth Mandava<sup>b1</sup>, U. Sandhya Shenoy<sup>c</sup>, D. Krishna Bhat<sup>d</sup>, B. Khasimsaheb<sup>e</sup>,

A.K. Debnath<sup>a,f</sup>, Ajay Singh<sup>a,f</sup>, S. Neeleshwar<sup>b</sup>

<sup>a</sup>Technical Physics Division, Bhabha Atomic Research Centre, Mumbai-400085, India

<sup>b</sup>Guru Gobind Singh Indraprastha University, Delhi-110078, India

<sup>c</sup>Department of Chemistry, College of Engineering and Technology, Srinivas University, Mukka -574146, Mangalore, Karnataka, India

<sup>d</sup>Department of Chemistry, National Institute of Technology Karnataka, Surathkal, Srinivasnagar -575025, Mangalore, Karnataka, India

<sup>e</sup>Institute of Physics, Academia Sinica, Taipei, Taiwan - 11529.

<sup>f</sup>Homi Bhabha National Institute, Mumbai 400094, India.

\*Corresponding author: [ranitapaul@gmail.com](mailto:ranitapaul@gmail.com) ; [ranitab@barc.gov.in](mailto:ranitab@barc.gov.in);

Tel.: (+91)2225593217; 9769270664

<sup>1</sup> Authors contributed equally to this work.

### Supplementary Information

#### S1: EDS spectra and corresponding quantitative analysis as well as point scan of the nano-precipitates of Sb alloyed SnTe samples

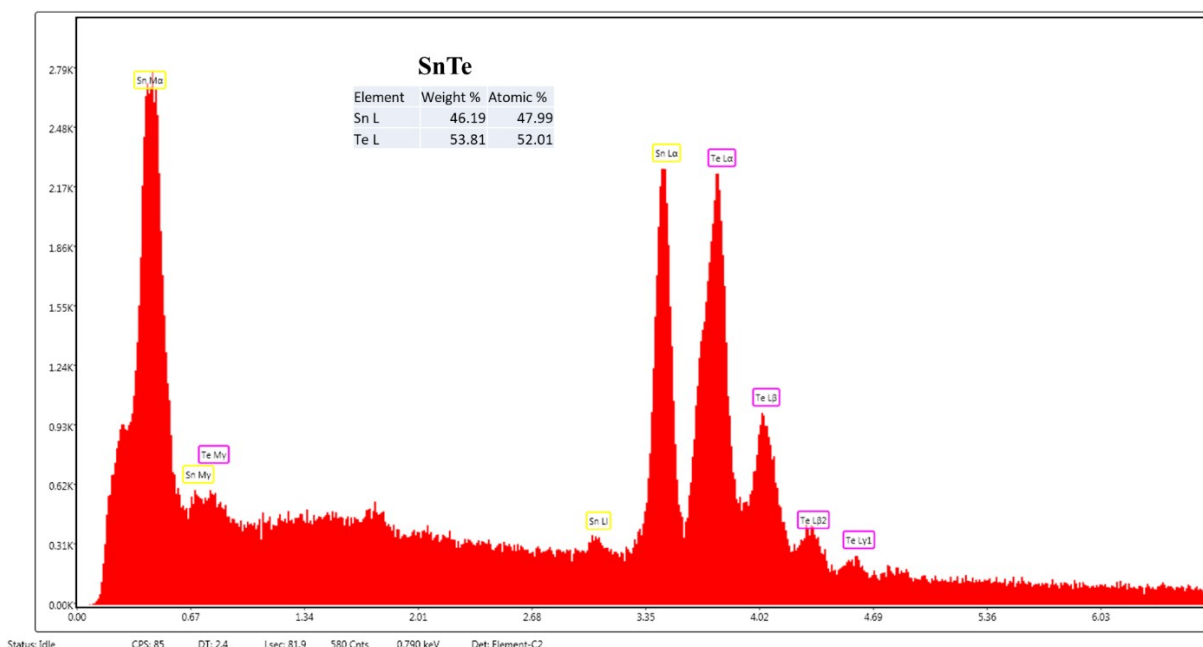

# SnTe

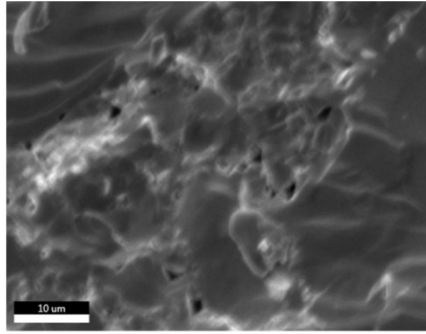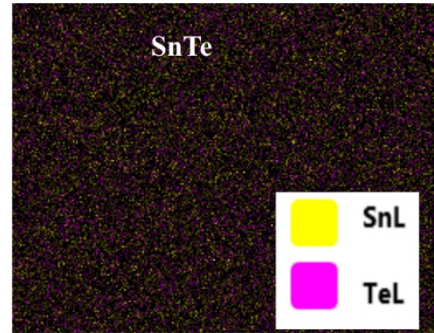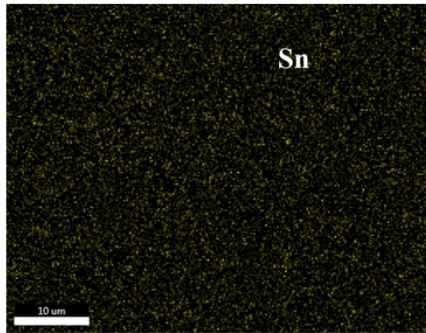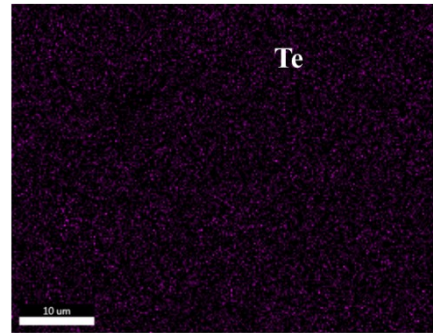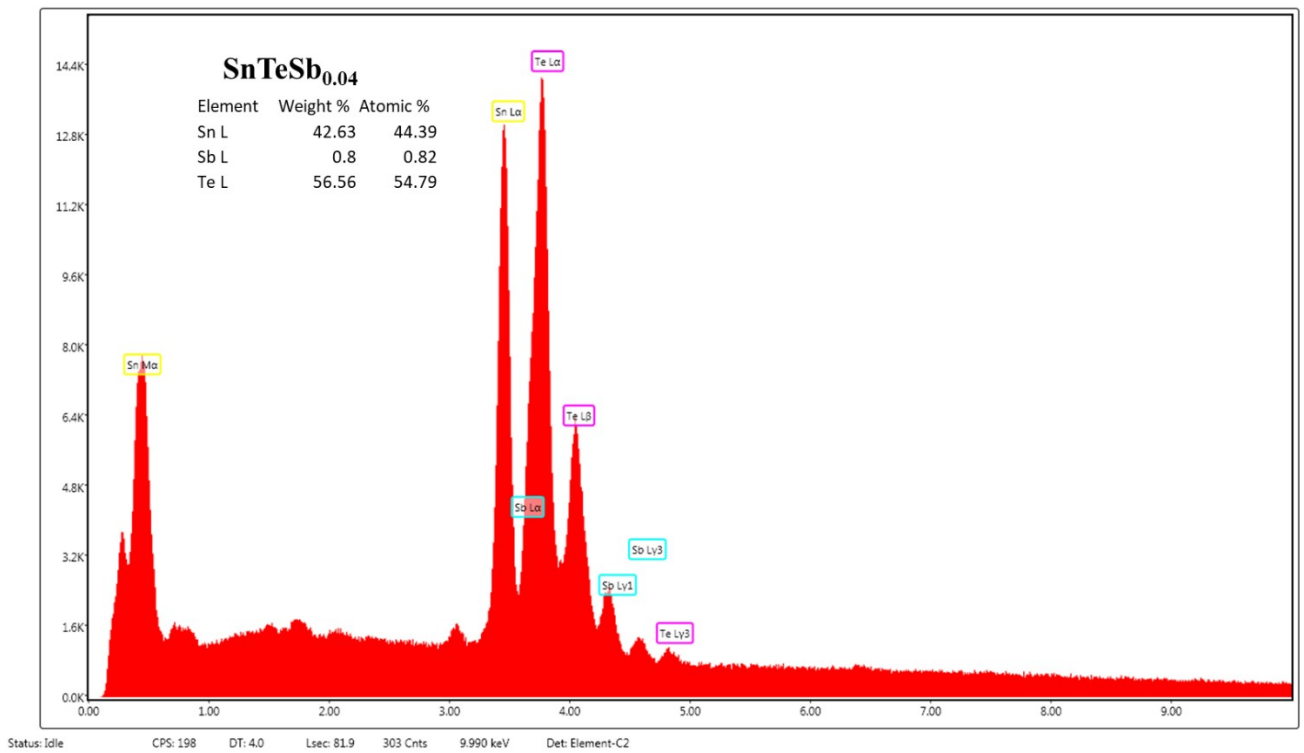

SnTeSb<sub>0.04</sub>

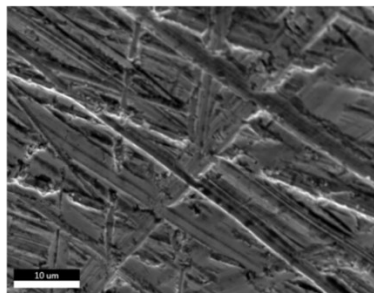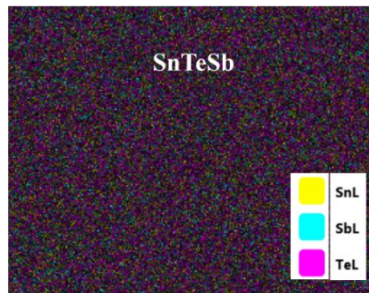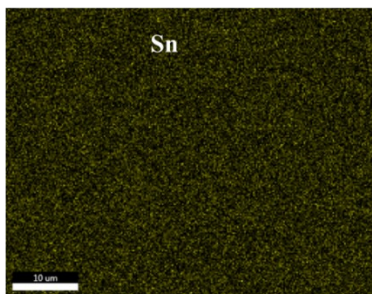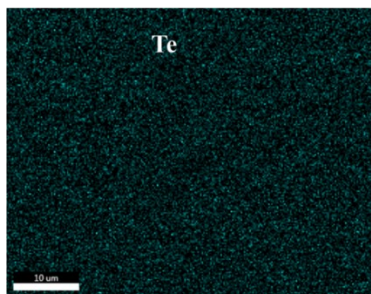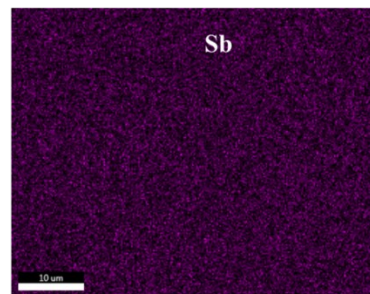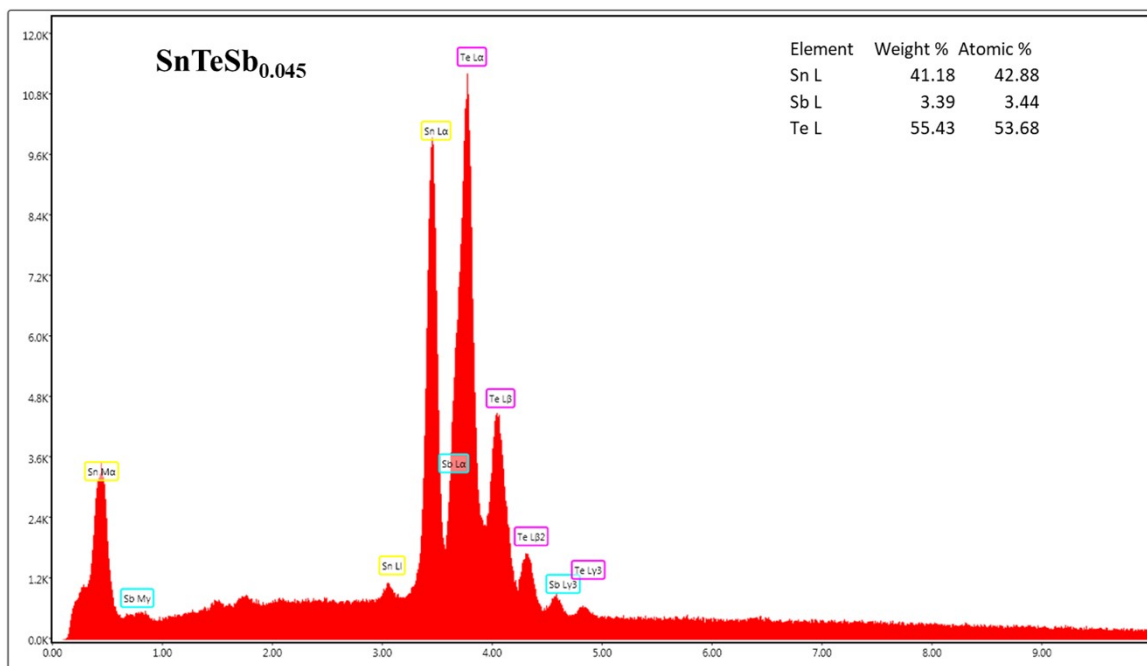

$\text{SnTeSb}_{0.045}$

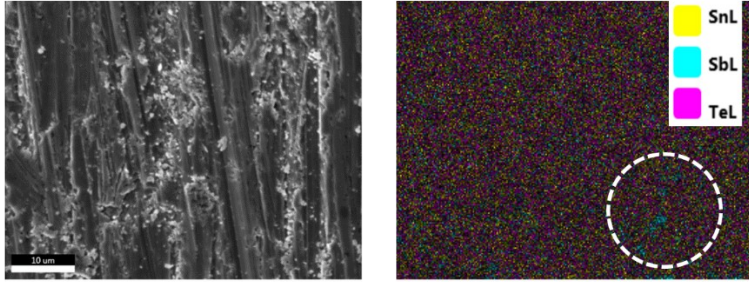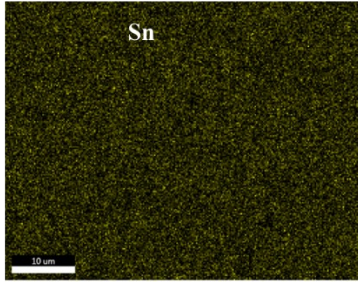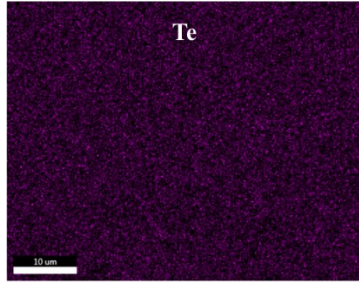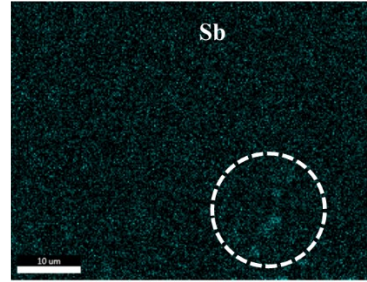

$\text{SnTeSb}_{0.045}$

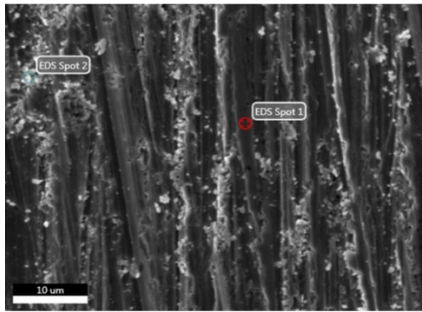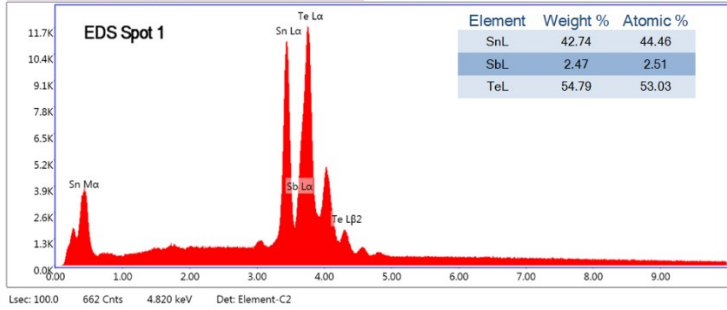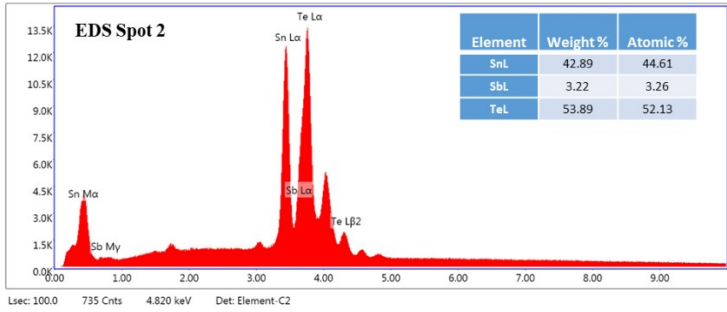

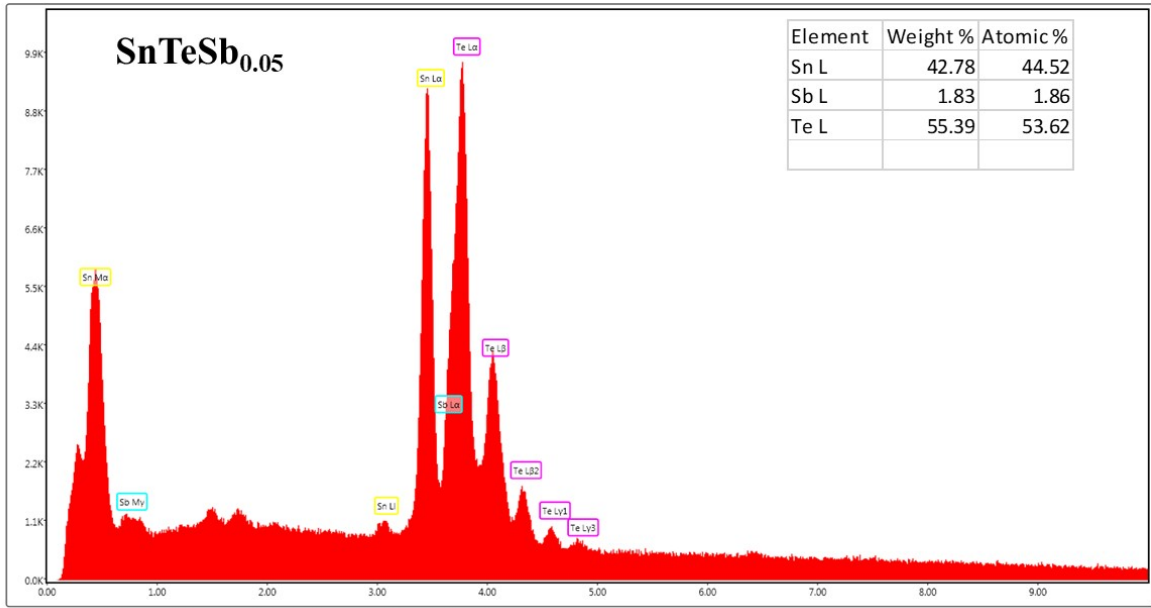

**SnTeSb<sub>0.05</sub>**

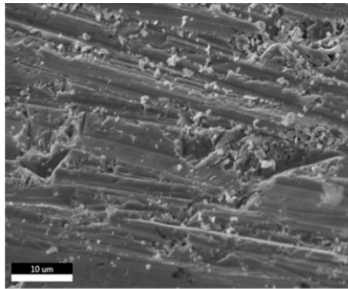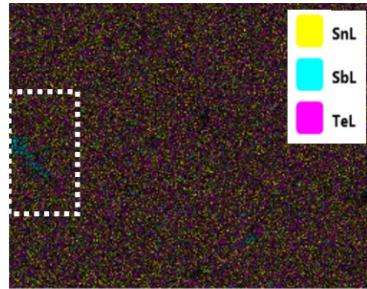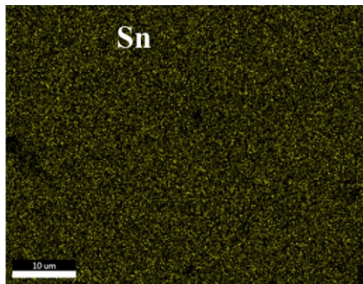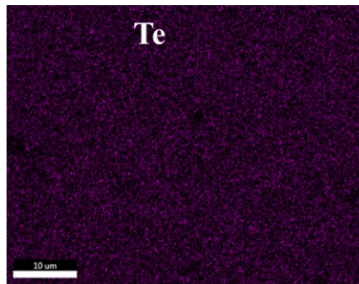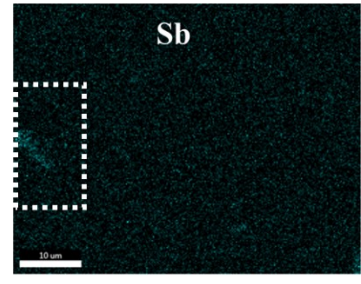

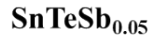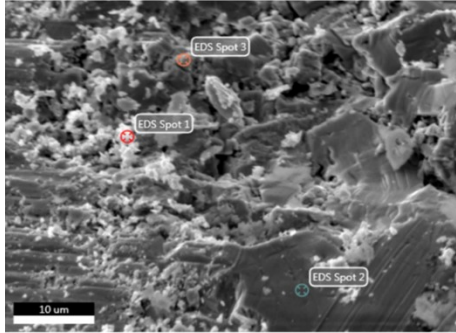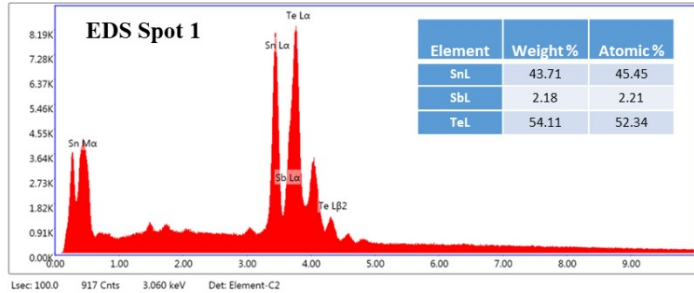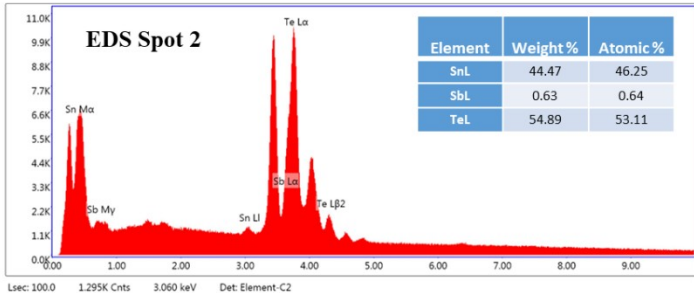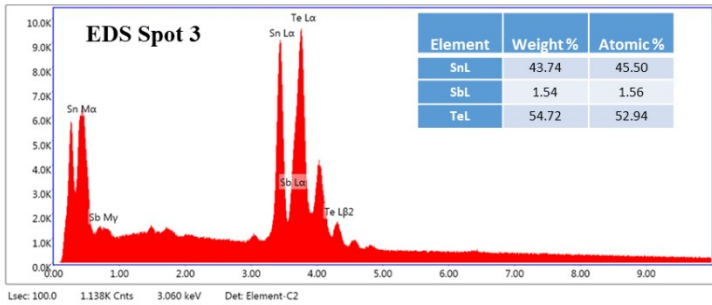

**S2: Calculation of *L* value obtained from the accepted methodology of fitting the Seebeck data to the reduced chemical potential**

| Temperature (K) | Seebeck (μV/K) | Fitted Seebeck (μV/K) | $\eta_r$ reduced chemical potential | orenz Number ( $\times 10^{-8} \text{ W}\Omega\text{K}^{-2}$ ) | Hall Factor, $r_H$ | ahn coefficient, $(\text{m}^{-3}\text{K}^{-1})$ | carrier density, $\text{m}^{-3}$ | $\text{m}^2/\text{m}_0$ |
|-----------------|----------------|-----------------------|-------------------------------------|----------------------------------------------------------------|--------------------|-------------------------------------------------|----------------------------------|-------------------------|
| 300             | 112.831        | 112.7351572           | 1.994522171                         | 1.863855941                                                    | 1.090673276        | 8.93E-002                                       | 7.63E+19                         | 0.00011                 |
| 324.47047       | 325.576        | 325.5872732           | -1.688974342                        | 1.528552968                                                    | 1.185797834        | 1.30E-007                                       | 5.70E+25                         | 5.82932                 |
| 366.66394       | 346.8913       | 346.9032137           | -1.955286413                        | 1.521773419                                                    | 1.188405998        | 1.30E-007                                       | 5.71E+25                         | 6.08591                 |
| 414.4298        | 371.4039       | 371.4062539           | -2.256121525                        | 1.515795257                                                    | 1.190734873        | 1.30E-007                                       | 5.72E+25                         | 6.54605                 |
| 462.6243        | 387.3152       | 387.344994            | -2.449446972                        | 1.512725878                                                    | 1.191941258        | 1.30E-007                                       | 5.73E+25                         | 6.65317                 |
| 510.557         | 408.2097       | 408.2554686           | -2.70087223                         | 1.509476677                                                    | 1.19323865         | 1.30E-007                                       | 5.74E+25                         | 7.10893                 |
| 558.6706        | 423.9881       | 424.0031153           | -2.88881715                         | 1.507490789                                                    | 1.194015708        | 1.30E-007                                       | 5.74E+25                         | 7.35192                 |
| 606.8872        | 429.8385       | 429.8596024           | -2.95854508                         | 1.50684195                                                     | 1.194274305        | 1.30E-007                                       | 5.74E+25                         | 7.08572                 |
| 655.1944        | 450.3333       | 450.2891239           | -3.20070889                         | 1.50489434                                                     | 1.195052515        | 1.30E-007                                       | 5.75E+25                         | 7.70059                 |
| 703.3427        | 461.5267       | 461.4759486           | -3.332802384                        | 1.504007923                                                    | 1.19540769         | 1.30E-007                                       | 5.75E+25                         | 7.82801                 |

### S3: Calculation of maximum efficiency

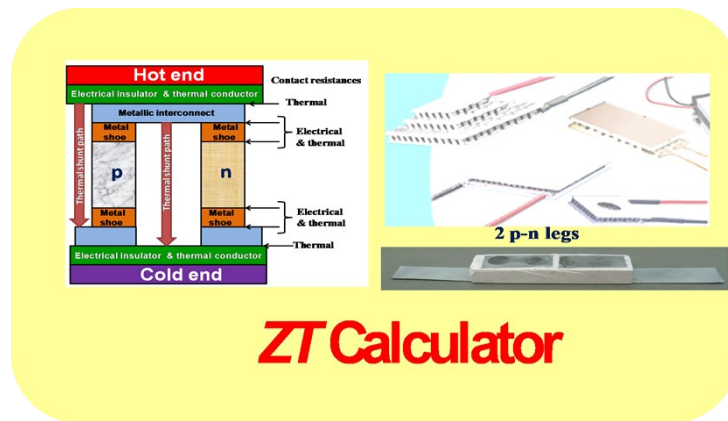

Although there is no analytic expression for  $Z$ , it can be calculated to any desired accuracy numerically with a simple procedure which can be done on a spreadsheet. To calculate the maximum efficiency  $Z$  and  $ZT$  follow these steps:

(1) Paste the temperature dependent  $S(T)$ ,  $\rho(T)$ , and  $\kappa(T)$  into the  $T$ ,  $S$ ,  $\rho$ , and  $\kappa$  columns – the 4 columns in the table are shaded blue. The cold side temperature for the calculation is the first temperature, 300 K. We shall use 800 K for hot side temperature for the example in Table 1. As per the literature, 25 K temperature intervals were maintained between data points, but that can vary. Smaller temperature steps give more accurate calculations.

(2) The first entry of the relative current value  $u$  is to be optimized. The values for  $u$  at higher temperature will adjust accordingly. This is similar to setting the electrical current (or load resistance) through the device. The power and therefore efficiency will be low at low values of  $u$  because little electrical current will be flowing through the device and low at high values of  $u$  because the output voltage will drop at high currents (and even becomes negative). For good efficiency the  $u$  values should be close to the compatibility factor  $s$  in the column next to  $u$ . Calculation for  $u = 0$  is to be avoided as some calculations become undefined, but  $u$  arbitrarily small is fine (e.g.  $u = 0.001$ ).

The efficiency of this thermoelectric leg is given in the efficiency column. The calculation assumes the first row (300 K in the Table) is the cold side. For 800 K hot side we should optimize the efficiency of the last row. MS Excel has a solver add-in that makes this easy, but other methods or adjusting by hand also works.

(3) The device ZT is calculated from the maximum efficiency value found by optimizing cold

side u value and the eqn. is given by 
$$ZT = \left( \frac{T_h - T_c(1 - \eta)}{T_h(1 - \eta) - T_c} \right)^2 - 1$$
.

### S.3.1 Spreadsheet for the calculation of ZT for SnTe

| T<br>(C) | Material | T<br>(K) | Seebeck<br>( $\mu\text{V/K}$ ) | resistivity<br>( $10^{-3} \Omega \text{ cm}$ ) | thermal cond<br>(W/m K) | zT   | max red eff | s<br>(1/V) | u<br>(1/V) | red eff | $\phi$<br>(V) | efficiency | ZT   |
|----------|----------|----------|--------------------------------|------------------------------------------------|-------------------------|------|-------------|------------|------------|---------|---------------|------------|------|
| 27       | p-SnTe   | 300      | 34                             | 0.13                                           | 7.35                    | 0.04 | 0.9%        | 1.76       | 1.6573     | 0.9%    | 0.614         |            |      |
| 52       | p-SnTe   | 325      | 35                             | 0.14                                           | 7.16                    | 0.04 | 1.0%        | 1.73       | 1.6595     | 1.0%    | 0.614         | 0.1%       | 0.04 |
| 77       | p-SnTe   | 350      | 36                             | 0.15                                           | 6.97                    | 0.04 | 1.1%        | 1.70       | 1.6619     | 1.1%    | 0.614         | 0.1%       | 0.04 |
| 102      | p-SnTe   | 375      | 38                             | 0.16                                           | 6.78                    | 0.05 | 1.2%        | 1.67       | 1.6646     | 1.2%    | 0.615         | 0.2%       | 0.04 |
| 127      | p-SnTe   | 400      | 39                             | 0.18                                           | 6.59                    | 0.05 | 1.3%        | 1.64       | 1.6675     | 1.3%    | 0.615         | 0.3%       | 0.04 |
| 152      | p-SnTe   | 425      | 41                             | 0.19                                           | 6.41                    | 0.06 | 1.4%        | 1.62       | 1.6707     | 1.4%    | 0.616         | 0.4%       | 0.05 |
| 177      | p-SnTe   | 450      | 42                             | 0.21                                           | 6.23                    | 0.06 | 1.5%        | 1.60       | 1.6743     | 1.5%    | 0.616         | 0.5%       | 0.05 |
| 202      | p-SnTe   | 475      | 44                             | 0.23                                           | 6.04                    | 0.07 | 1.6%        | 1.59       | 1.6783     | 1.6%    | 0.617         | 0.6%       | 0.05 |
| 227      | p-SnTe   | 500      | 46                             | 0.25                                           | 5.86                    | 0.07 | 1.8%        | 1.58       | 1.6827     | 1.8%    | 0.617         | 0.6%       | 0.05 |
| 252      | p-SnTe   | 525      | 49                             | 0.26                                           | 5.68                    | 0.08 | 2.0%        | 1.58       | 1.6877     | 2.0%    | 0.618         | 0.7%       | 0.06 |
| 277      | p-SnTe   | 550      | 51                             | 0.28                                           | 5.51                    | 0.09 | 2.2%        | 1.59       | 1.6933     | 2.2%    | 0.619         | 0.8%       | 0.06 |
| 302      | p-SnTe   | 575      | 54                             | 0.31                                           | 5.33                    | 0.10 | 2.4%        | 1.61       | 1.6996     | 2.4%    | 0.619         | 0.9%       | 0.06 |
| 327      | p-SnTe   | 600      | 57                             | 0.33                                           | 5.15                    | 0.11 | 2.7%        | 1.63       | 1.7067     | 2.7%    | 0.620         | 1.0%       | 0.06 |
| 352      | p-SnTe   | 625      | 60                             | 0.35                                           | 4.98                    | 0.13 | 3.0%        | 1.66       | 1.7146     | 3.0%    | 0.621         | 1.1%       | 0.07 |
| 377      | p-SnTe   | 650      | 63                             | 0.37                                           | 4.80                    | 0.14 | 3.4%        | 1.70       | 1.7234     | 3.4%    | 0.621         | 1.3%       | 0.07 |
| 402      | p-SnTe   | 675      | 67                             | 0.40                                           | 4.63                    | 0.16 | 3.8%        | 1.75       | 1.7334     | 3.8%    | 0.622         | 1.4%       | 0.08 |
| 427      | p-SnTe   | 700      | 71                             | 0.43                                           | 4.45                    | 0.19 | 4.3%        | 1.80       | 1.7445     | 4.3%    | 0.623         | 1.6%       | 0.08 |
| 452      | p-SnTe   | 725      | 76                             | 0.45                                           | 4.28                    | 0.22 | 4.9%        | 1.86       | 1.7570     | 4.9%    | 0.624         | 1.7%       | 0.09 |
| 477      | p-SnTe   | 750      | 81                             | 0.48                                           | 4.10                    | 0.25 | 5.5%        | 1.93       | 1.7710     | 5.5%    | 0.625         | 1.9%       | 0.09 |
| 502      | p-SnTe   | 775      | 86                             | 0.51                                           | 3.93                    | 0.29 | 6.3%        | 2.00       | 1.7867     | 6.2%    | 0.626         | 2.1%       | 0.10 |

### S.3.2 Spreadsheet for the calculation of ZT for SnTeSb<sub>0.02</sub>



| $T$<br>(C) | Material      | $T$<br>(K) | Seebeck<br>( $\mu\text{V}/\text{K}$ ) | resistivity<br>( $10^{-3} \Omega \text{ cm}$ ) | thermal cond<br>( $\text{W}/\text{m K}$ ) | $zT$ | max red eff | $s$<br>( $1/\text{V}$ ) | $u$<br>( $1/\text{V}$ ) | red eff | $\Phi$<br>(V) | efficiency | $ZT$ |
|------------|---------------|------------|---------------------------------------|------------------------------------------------|-------------------------------------------|------|-------------|-------------------------|-------------------------|---------|---------------|------------|------|
| 27         | p-SnTeSb_0.02 | 300        | 29                                    | 0.16                                           | 7.05                                      | 0.02 | 0.6%        | 1.30                    | 1.8532                  | 0.5%    | 0.548         |            |      |
| 52         | p-SnTeSb_0.02 | 325        | 30                                    | 0.17                                           | 6.85                                      | 0.02 | 0.6%        | 1.29                    | 1.8558                  | 0.5%    | 0.548         | 0.0%       | 0.02 |
| 77         | p-SnTeSb_0.02 | 350        | 31                                    | 0.18                                           | 6.66                                      | 0.03 | 0.7%        | 1.32                    | 1.8598                  | 0.6%    | 0.549         | 0.1%       | 0.02 |
| 102        | p-SnTeSb_0.02 | 375        | 33                                    | 0.19                                           | 6.48                                      | 0.03 | 0.8%        | 1.36                    | 1.8644                  | 0.7%    | 0.549         | 0.1%       | 0.02 |
| 127        | p-SnTeSb_0.02 | 400        | 36                                    | 0.20                                           | 6.29                                      | 0.04 | 1.0%        | 1.41                    | 1.8698                  | 0.9%    | 0.549         | 0.2%       | 0.03 |
| 152        | p-SnTeSb_0.02 | 425        | 39                                    | 0.22                                           | 6.10                                      | 0.05 | 1.2%        | 1.46                    | 1.8760                  | 1.1%    | 0.550         | 0.2%       | 0.03 |
| 177        | p-SnTeSb_0.02 | 450        | 42                                    | 0.23                                           | 5.89                                      | 0.06 | 1.4%        | 1.53                    | 1.8832                  | 1.4%    | 0.550         | 0.3%       | 0.03 |
| 202        | p-SnTeSb_0.02 | 475        | 46                                    | 0.25                                           | 5.69                                      | 0.07 | 1.7%        | 1.60                    | 1.8914                  | 1.7%    | 0.550         | 0.4%       | 0.04 |
| 227        | p-SnTeSb_0.02 | 500        | 50                                    | 0.26                                           | 5.49                                      | 0.09 | 2.1%        | 1.69                    | 1.9015                  | 2.0%    | 0.551         | 0.5%       | 0.04 |
| 252        | p-SnTeSb_0.02 | 525        | 53                                    | 0.28                                           | 5.29                                      | 0.10 | 2.4%        | 1.75                    | 1.9103                  | 2.4%    | 0.551         | 0.6%       | 0.04 |
| 277        | p-SnTeSb_0.02 | 550        | 58                                    | 0.30                                           | 5.09                                      | 0.12 | 2.8%        | 1.83                    | 1.9221                  | 2.8%    | 0.552         | 0.7%       | 0.05 |
| 302        | p-SnTeSb_0.02 | 575        | 63                                    | 0.32                                           | 4.88                                      | 0.15 | 3.4%        | 1.94                    | 1.9364                  | 3.4%    | 0.553         | 0.8%       | 0.06 |
| 327        | p-SnTeSb_0.02 | 600        | 68                                    | 0.35                                           | 4.67                                      | 0.17 | 4.0%        | 2.02                    | 1.9502                  | 4.0%    | 0.554         | 1.0%       | 0.06 |
| 352        | p-SnTeSb_0.02 | 625        | 74                                    | 0.37                                           | 4.45                                      | 0.20 | 4.6%        | 2.12                    | 1.9656                  | 4.6%    | 0.555         | 1.2%       | 0.07 |
| 377        | p-SnTeSb_0.02 | 650        | 80                                    | 0.40                                           | 4.24                                      | 0.24 | 5.4%        | 2.22                    | 1.9840                  | 5.4%    | 0.556         | 1.4%       | 0.08 |
| 402        | p-SnTeSb_0.02 | 675        | 85                                    | 0.44                                           | 4.03                                      | 0.28 | 6.1%        | 2.28                    | 2.0019                  | 6.1%    | 0.557         | 1.6%       | 0.09 |
| 427        | p-SnTeSb_0.02 | 700        | 91                                    | 0.46                                           | 3.81                                      | 0.33 | 7.1%        | 2.39                    | 2.0218                  | 6.9%    | 0.558         | 1.8%       | 0.10 |
| 452        | p-SnTeSb_0.02 | 725        | 97                                    | 0.50                                           | 3.60                                      | 0.38 | 8.1%        | 2.50                    | 2.0439                  | 7.9%    | 0.560         | 2.1%       | 0.11 |
| 477        | p-SnTeSb_0.02 | 750        | 104                                   | 0.54                                           | 3.38                                      | 0.44 | 9.1%        | 2.57                    | 2.0683                  | 8.8%    | 0.561         | 2.4%       | 0.12 |
| 502        | p-SnTeSb_0.02 | 775        | 111                                   | 0.58                                           | 3.16                                      | 0.52 | 10.5%       | 2.72                    | 2.0954                  | 10.0%   | 0.563         | 2.7%       | 0.13 |

### S.3.3 Spreadsheet for the calculation of $ZT$ for $\text{SnTeSb}_{0.03}$

| $T$<br>(C) | Material      | $T$<br>(K) | Seebeck<br>( $\mu\text{V}/\text{K}$ ) | resistivity<br>( $10^{-3} \Omega \text{ cm}$ ) | thermal cond<br>( $\text{W}/\text{m K}$ ) | $zT$ | max red eff | $s$<br>( $1/\text{V}$ ) | $u$<br>( $1/\text{V}$ ) | red eff | $\Phi$<br>(V) | efficiency | $ZT$ |
|------------|---------------|------------|---------------------------------------|------------------------------------------------|-------------------------------------------|------|-------------|-------------------------|-------------------------|---------|---------------|------------|------|
| 27         | p-SnTeSb_0.03 | 300        | 24                                    | 0.19                                           | 6.10                                      | 0.02 | 0.4%        | 1.04                    | 1.9430                  | 0.1%    | 0.522         |            |      |
| 52         | p-SnTeSb_0.03 | 325        | 26                                    | 0.20                                           | 5.87                                      | 0.02 | 0.5%        | 1.10                    | 1.9473                  | 0.2%    | 0.522         | 0.0%       | 0.01 |
| 77         | p-SnTeSb_0.03 | 350        | 29                                    | 0.21                                           | 5.66                                      | 0.02 | 0.6%        | 1.17                    | 1.9525                  | 0.3%    | 0.522         | 0.0%       | 0.01 |
| 102        | p-SnTeSb_0.03 | 375        | 31                                    | 0.23                                           | 5.45                                      | 0.03 | 0.7%        | 1.23                    | 1.9579                  | 0.5%    | 0.522         | 0.1%       | 0.01 |
| 127        | p-SnTeSb_0.03 | 400        | 34                                    | 0.24                                           | 5.25                                      | 0.04 | 0.9%        | 1.33                    | 1.9649                  | 0.7%    | 0.522         | 0.1%       | 0.01 |
| 152        | p-SnTeSb_0.03 | 425        | 37                                    | 0.26                                           | 5.05                                      | 0.05 | 1.1%        | 1.43                    | 1.9730                  | 1.0%    | 0.523         | 0.1%       | 0.02 |
| 177        | p-SnTeSb_0.03 | 450        | 41                                    | 0.27                                           | 4.83                                      | 0.06 | 1.4%        | 1.54                    | 1.9822                  | 1.3%    | 0.523         | 0.2%       | 0.02 |
| 202        | p-SnTeSb_0.03 | 475        | 45                                    | 0.29                                           | 4.63                                      | 0.07 | 1.7%        | 1.64                    | 1.9919                  | 1.6%    | 0.523         | 0.3%       | 0.03 |
| 227        | p-SnTeSb_0.03 | 500        | 49                                    | 0.31                                           | 4.44                                      | 0.09 | 2.1%        | 1.74                    | 2.0029                  | 2.1%    | 0.524         | 0.4%       | 0.03 |
| 252        | p-SnTeSb_0.03 | 525        | 55                                    | 0.34                                           | 4.25                                      | 0.11 | 2.6%        | 1.86                    | 2.0163                  | 2.6%    | 0.525         | 0.5%       | 0.04 |
| 277        | p-SnTeSb_0.03 | 550        | 60                                    | 0.36                                           | 4.06                                      | 0.13 | 3.1%        | 1.96                    | 2.0302                  | 3.1%    | 0.525         | 0.6%       | 0.04 |
| 302        | p-SnTeSb_0.03 | 575        | 65                                    | 0.39                                           | 3.88                                      | 0.16 | 3.8%        | 2.09                    | 2.0472                  | 3.8%    | 0.526         | 0.8%       | 0.05 |
| 327        | p-SnTeSb_0.03 | 600        | 72                                    | 0.42                                           | 3.69                                      | 0.20 | 4.5%        | 2.21                    | 2.0661                  | 4.5%    | 0.527         | 1.0%       | 0.06 |
| 352        | p-SnTeSb_0.03 | 625        | 79                                    | 0.45                                           | 3.51                                      | 0.24 | 5.5%        | 2.35                    | 2.0885                  | 5.4%    | 0.528         | 1.2%       | 0.07 |
| 377        | p-SnTeSb_0.03 | 650        | 86                                    | 0.49                                           | 3.34                                      | 0.30 | 6.5%        | 2.47                    | 2.1135                  | 6.4%    | 0.529         | 1.4%       | 0.08 |
| 402        | p-SnTeSb_0.03 | 675        | 94                                    | 0.53                                           | 3.17                                      | 0.35 | 7.5%        | 2.58                    | 2.1398                  | 7.4%    | 0.531         | 1.6%       | 0.09 |
| 427        | p-SnTeSb_0.03 | 700        | 101                                   | 0.58                                           | 3.01                                      | 0.41 | 8.6%        | 2.67                    | 2.1676                  | 8.4%    | 0.532         | 1.9%       | 0.10 |
| 452        | p-SnTeSb_0.03 | 725        | 109                                   | 0.63                                           | 2.85                                      | 0.48 | 9.8%        | 2.75                    | 2.1985                  | 9.5%    | 0.534         | 2.2%       | 0.11 |
| 477        | p-SnTeSb_0.03 | 750        | 117                                   | 0.68                                           | 2.69                                      | 0.56 | 11.1%       | 2.84                    | 2.2330                  | 10.7%   | 0.536         | 2.6%       | 0.13 |
| 502        | p-SnTeSb_0.03 | 775        | 126                                   | 0.74                                           | 2.54                                      | 0.65 | 12.4%       | 2.92                    | 2.2713                  | 11.9%   | 0.538         | 2.9%       | 0.14 |

### S.3.4 Spreadsheet for the calculation of $ZT$ for $\text{SnTeSb}_{0.035}$

| $T$<br>(C) | Material       | $T$<br>(K) | Seebeck<br>( $\mu\text{V/K}$ ) | resistivity<br>( $10^{-3} \Omega \text{ cm}$ ) | thermal cond<br>( $\text{W/m K}$ ) | $zT$ | max red eff | $s$<br>( $1/\text{V}$ ) | $u$<br>( $1/\text{V}$ ) | red eff | $\phi$<br>(V) | efficiency | $ZT$ |
|------------|----------------|------------|--------------------------------|------------------------------------------------|------------------------------------|------|-------------|-------------------------|-------------------------|---------|---------------|------------|------|
| 27         | p-SnTeSb_0.035 | 300        | 20                             | 0.17                                           | 6.60                               | 0.01 | 0.3%        | 0.88                    | 1.8676                  | -0.1%   | 0.541         |            |      |
| 52         | p-SnTeSb_0.035 | 325        | 23                             | 0.18                                           | 6.36                               | 0.01 | 0.4%        | 0.96                    | 1.8721                  | 0.0%    | 0.541         | 0.0%       | 0.00 |
| 77         | p-SnTeSb_0.035 | 350        | 25                             | 0.19                                           | 6.13                               | 0.02 | 0.5%        | 1.04                    | 1.8770                  | 0.2%    | 0.542         | 0.0%       | 0.00 |
| 102        | p-SnTeSb_0.035 | 375        | 28                             | 0.21                                           | 5.90                               | 0.02 | 0.6%        | 1.13                    | 1.8826                  | 0.3%    | 0.542         | 0.0%       | 0.00 |
| 127        | p-SnTeSb_0.035 | 400        | 31                             | 0.22                                           | 5.67                               | 0.03 | 0.8%        | 1.22                    | 1.8892                  | 0.5%    | 0.542         | 0.1%       | 0.01 |
| 152        | p-SnTeSb_0.035 | 425        | 35                             | 0.24                                           | 5.45                               | 0.04 | 1.0%        | 1.32                    | 1.8967                  | 0.8%    | 0.542         | 0.1%       | 0.01 |
| 177        | p-SnTeSb_0.035 | 450        | 39                             | 0.26                                           | 5.22                               | 0.05 | 1.2%        | 1.43                    | 1.9054                  | 1.1%    | 0.542         | 0.1%       | 0.01 |
| 202        | p-SnTeSb_0.035 | 475        | 43                             | 0.28                                           | 4.99                               | 0.06 | 1.6%        | 1.54                    | 1.9153                  | 1.5%    | 0.543         | 0.2%       | 0.02 |
| 227        | p-SnTeSb_0.035 | 500        | 48                             | 0.30                                           | 4.77                               | 0.08 | 1.9%        | 1.66                    | 1.9265                  | 1.9%    | 0.543         | 0.3%       | 0.02 |
| 252        | p-SnTeSb_0.035 | 525        | 53                             | 0.32                                           | 4.55                               | 0.10 | 2.4%        | 1.77                    | 1.9391                  | 2.4%    | 0.544         | 0.4%       | 0.03 |
| 277        | p-SnTeSb_0.035 | 550        | 59                             | 0.35                                           | 4.34                               | 0.13 | 3.0%        | 1.88                    | 1.9534                  | 3.0%    | 0.544         | 0.5%       | 0.04 |
| 302        | p-SnTeSb_0.035 | 575        | 65                             | 0.38                                           | 4.13                               | 0.16 | 3.6%        | 2.00                    | 1.9694                  | 3.6%    | 0.545         | 0.7%       | 0.04 |
| 327        | p-SnTeSb_0.035 | 600        | 71                             | 0.41                                           | 3.91                               | 0.19 | 4.3%        | 2.12                    | 1.9873                  | 4.3%    | 0.546         | 0.8%       | 0.05 |
| 352        | p-SnTeSb_0.035 | 625        | 78                             | 0.45                                           | 3.70                               | 0.23 | 5.2%        | 2.24                    | 2.0073                  | 5.1%    | 0.547         | 1.0%       | 0.06 |
| 377        | p-SnTeSb_0.035 | 650        | 86                             | 0.49                                           | 3.50                               | 0.28 | 6.1%        | 2.35                    | 2.0296                  | 6.0%    | 0.548         | 1.3%       | 0.07 |
| 402        | p-SnTeSb_0.035 | 675        | 93                             | 0.53                                           | 3.29                               | 0.33 | 7.2%        | 2.46                    | 2.0545                  | 7.0%    | 0.550         | 1.5%       | 0.08 |
| 427        | p-SnTeSb_0.035 | 700        | 101                            | 0.58                                           | 3.10                               | 0.40 | 8.4%        | 2.58                    | 2.0821                  | 8.1%    | 0.551         | 1.8%       | 0.09 |
| 452        | p-SnTeSb_0.035 | 725        | 110                            | 0.63                                           | 2.90                               | 0.48 | 9.7%        | 2.70                    | 2.1128                  | 9.3%    | 0.553         | 2.1%       | 0.11 |
| 477        | p-SnTeSb_0.035 | 750        | 119                            | 0.69                                           | 2.70                               | 0.57 | 11.2%       | 2.83                    | 2.1470                  | 10.6%   | 0.555         | 2.4%       | 0.12 |
| 502        | p-SnTeSb_0.035 | 775        | 128                            | 0.75                                           | 2.51                               | 0.68 | 12.8%       | 2.97                    | 2.1849                  | 12.1%   | 0.557         | 2.8%       | 0.14 |

### S.3.5 Spreadsheet for the calculation of $ZT$ for $\text{SnTeSb}_{0.04}$

| $T$<br>(C) | Material      | $T$<br>(K) | Seebeck<br>( $\mu\text{V/K}$ ) | resistivity<br>( $10^{-3} \Omega \text{ cm}$ ) | thermal cond<br>( $\text{W/m K}$ ) | $zT$ | max red eff | $s$<br>( $1/\text{V}$ ) | $u$<br>( $1/\text{V}$ ) | red eff | $\phi$<br>(V) | efficiency | $ZT$ |
|------------|---------------|------------|--------------------------------|------------------------------------------------|------------------------------------|------|-------------|-------------------------|-------------------------|---------|---------------|------------|------|
| 27         | p-SnTeSb_0.04 | 300        | 20                             | 0.20                                           | 6.27                               | 0.01 | 0.2%        | 0.79                    | 1.6835                  | -0.1%   | 0.600         |            |      |
| 52         | p-SnTeSb_0.04 | 325        | 23                             | 0.22                                           | 6.06                               | 0.01 | 0.3%        | 0.86                    | 1.6871                  | 0.0%    | 0.600         | 0.0%       | 0.00 |
| 77         | p-SnTeSb_0.04 | 350        | 25                             | 0.23                                           | 5.87                               | 0.02 | 0.4%        | 0.92                    | 1.6911                  | 0.1%    | 0.600         | 0.0%       | 0.00 |
| 102        | p-SnTeSb_0.04 | 375        | 28                             | 0.25                                           | 5.67                               | 0.02 | 0.5%        | 1.00                    | 1.6957                  | 0.3%    | 0.600         | 0.0%       | 0.00 |
| 127        | p-SnTeSb_0.04 | 400        | 31                             | 0.26                                           | 5.48                               | 0.03 | 0.7%        | 1.08                    | 1.7012                  | 0.5%    | 0.600         | 0.0%       | 0.01 |
| 152        | p-SnTeSb_0.04 | 425        | 35                             | 0.28                                           | 5.28                               | 0.04 | 0.9%        | 1.17                    | 1.7074                  | 0.7%    | 0.601         | 0.1%       | 0.01 |
| 177        | p-SnTeSb_0.04 | 450        | 39                             | 0.30                                           | 5.07                               | 0.05 | 1.1%        | 1.27                    | 1.7146                  | 1.0%    | 0.601         | 0.1%       | 0.01 |
| 202        | p-SnTeSb_0.04 | 475        | 44                             | 0.32                                           | 4.86                               | 0.06 | 1.4%        | 1.37                    | 1.7228                  | 1.3%    | 0.601         | 0.2%       | 0.02 |
| 227        | p-SnTeSb_0.04 | 500        | 49                             | 0.35                                           | 4.66                               | 0.07 | 1.8%        | 1.47                    | 1.7321                  | 1.7%    | 0.602         | 0.3%       | 0.02 |
| 252        | p-SnTeSb_0.04 | 525        | 54                             | 0.38                                           | 4.45                               | 0.09 | 2.2%        | 1.58                    | 1.7426                  | 2.2%    | 0.602         | 0.4%       | 0.03 |
| 277        | p-SnTeSb_0.04 | 550        | 60                             | 0.41                                           | 4.25                               | 0.11 | 2.7%        | 1.68                    | 1.7543                  | 2.7%    | 0.603         | 0.5%       | 0.03 |
| 302        | p-SnTeSb_0.04 | 575        | 66                             | 0.44                                           | 4.04                               | 0.14 | 3.3%        | 1.79                    | 1.7676                  | 3.3%    | 0.604         | 0.6%       | 0.04 |
| 327        | p-SnTeSb_0.04 | 600        | 73                             | 0.48                                           | 3.83                               | 0.17 | 4.0%        | 1.90                    | 1.7823                  | 4.0%    | 0.605         | 0.8%       | 0.05 |
| 352        | p-SnTeSb_0.04 | 625        | 80                             | 0.52                                           | 3.61                               | 0.21 | 4.8%        | 2.01                    | 1.7988                  | 4.7%    | 0.606         | 0.9%       | 0.05 |
| 377        | p-SnTeSb_0.04 | 650        | 87                             | 0.57                                           | 3.40                               | 0.25 | 5.7%        | 2.12                    | 1.8172                  | 5.5%    | 0.607         | 1.1%       | 0.06 |
| 402        | p-SnTeSb_0.04 | 675        | 95                             | 0.62                                           | 3.19                               | 0.31 | 6.7%        | 2.22                    | 1.8375                  | 6.5%    | 0.608         | 1.4%       | 0.07 |
| 427        | p-SnTeSb_0.04 | 700        | 103                            | 0.68                                           | 2.98                               | 0.37 | 7.8%        | 2.33                    | 1.8602                  | 7.5%    | 0.610         | 1.6%       | 0.08 |
| 452        | p-SnTeSb_0.04 | 725        | 112                            | 0.75                                           | 2.77                               | 0.44 | 9.0%        | 2.45                    | 1.8852                  | 8.6%    | 0.612         | 1.9%       | 0.10 |
| 477        | p-SnTeSb_0.04 | 750        | 121                            | 0.83                                           | 2.55                               | 0.52 | 10.4%       | 2.57                    | 1.9130                  | 9.9%    | 0.614         | 2.2%       | 0.11 |
| 502        | p-SnTeSb_0.04 | 775        | 131                            | 0.91                                           | 2.34                               | 0.62 | 12.0%       | 2.70                    | 1.9438                  | 11.2%   | 0.616         | 2.5%       | 0.12 |

### S.3.6 Spreadsheet for the calculation of $ZT$ for $\text{SnTeSb}_{0.045}$

| $T$<br>(C) | Material       | $T$<br>(K) | Seebeck<br>( $\mu\text{V}/\text{K}$ ) | resistivity<br>( $10^{-3} \Omega \text{ cm}$ ) | thermal cond<br>( $\text{W}/\text{m K}$ ) | $zT$ | max red eff | $s$<br>( $1/\text{V}$ ) | $u$<br>( $1/\text{V}$ ) | red eff | $\phi$<br>(V) | efficiency | $ZT$ |
|------------|----------------|------------|---------------------------------------|------------------------------------------------|-------------------------------------------|------|-------------|-------------------------|-------------------------|---------|---------------|------------|------|
| 27         | p-SnTeSb_0.045 | 300        | 20                                    | 0.17                                           | 6.31                                      | 0.01 | 0.3%        | 0.92                    | 1.8302                  | 0.0%    | 0.552         |            |      |
| 52         | p-SnTeSb_0.045 | 325        | 22                                    | 0.18                                           | 6.09                                      | 0.01 | 0.4%        | 0.98                    | 1.8341                  | 0.1%    | 0.552         | 0.0%       | 0.00 |
| 77         | p-SnTeSb_0.045 | 350        | 24                                    | 0.20                                           | 5.88                                      | 0.02 | 0.4%        | 1.04                    | 1.8383                  | 0.2%    | 0.552         | 0.0%       | 0.00 |
| 102        | p-SnTeSb_0.045 | 375        | 27                                    | 0.21                                           | 5.67                                      | 0.02 | 0.6%        | 1.11                    | 1.8433                  | 0.3%    | 0.553         | 0.0%       | 0.01 |
| 127        | p-SnTeSb_0.045 | 400        | 30                                    | 0.23                                           | 5.47                                      | 0.03 | 0.7%        | 1.19                    | 1.8493                  | 0.5%    | 0.553         | 0.1%       | 0.01 |
| 152        | p-SnTeSb_0.045 | 425        | 33                                    | 0.25                                           | 5.26                                      | 0.04 | 0.9%        | 1.28                    | 1.8562                  | 0.7%    | 0.553         | 0.1%       | 0.01 |
| 177        | p-SnTeSb_0.045 | 450        | 37                                    | 0.26                                           | 5.04                                      | 0.05 | 1.1%        | 1.38                    | 1.8642                  | 1.0%    | 0.553         | 0.1%       | 0.01 |
| 202        | p-SnTeSb_0.045 | 475        | 42                                    | 0.29                                           | 4.82                                      | 0.06 | 1.4%        | 1.48                    | 1.8735                  | 1.3%    | 0.554         | 0.2%       | 0.02 |
| 227        | p-SnTeSb_0.045 | 500        | 46                                    | 0.31                                           | 4.62                                      | 0.07 | 1.8%        | 1.59                    | 1.8840                  | 1.7%    | 0.554         | 0.3%       | 0.02 |
| 252        | p-SnTeSb_0.045 | 525        | 52                                    | 0.34                                           | 4.41                                      | 0.09 | 2.2%        | 1.69                    | 1.8961                  | 2.2%    | 0.554         | 0.4%       | 0.03 |
| 277        | p-SnTeSb_0.045 | 550        | 57                                    | 0.37                                           | 4.21                                      | 0.12 | 2.8%        | 1.80                    | 1.9097                  | 2.8%    | 0.555         | 0.5%       | 0.03 |
| 302        | p-SnTeSb_0.045 | 575        | 63                                    | 0.40                                           | 4.00                                      | 0.14 | 3.4%        | 1.91                    | 1.9251                  | 3.4%    | 0.556         | 0.6%       | 0.04 |
| 327        | p-SnTeSb_0.045 | 600        | 70                                    | 0.44                                           | 3.79                                      | 0.18 | 4.1%        | 2.03                    | 1.9425                  | 4.1%    | 0.557         | 0.8%       | 0.05 |
| 352        | p-SnTeSb_0.045 | 625        | 77                                    | 0.48                                           | 3.58                                      | 0.22 | 4.9%        | 2.15                    | 1.9619                  | 4.9%    | 0.558         | 1.0%       | 0.06 |
| 377        | p-SnTeSb_0.045 | 650        | 84                                    | 0.52                                           | 3.38                                      | 0.26 | 5.8%        | 2.27                    | 1.9836                  | 5.8%    | 0.559         | 1.2%       | 0.07 |
| 402        | p-SnTeSb_0.045 | 675        | 92                                    | 0.57                                           | 3.18                                      | 0.32 | 6.9%        | 2.39                    | 2.0079                  | 6.8%    | 0.560         | 1.4%       | 0.08 |
| 427        | p-SnTeSb_0.045 | 700        | 101                                   | 0.62                                           | 2.98                                      | 0.39 | 8.1%        | 2.52                    | 2.0350                  | 7.9%    | 0.562         | 1.7%       | 0.09 |
| 452        | p-SnTeSb_0.045 | 725        | 109                                   | 0.67                                           | 2.78                                      | 0.47 | 9.5%        | 2.66                    | 2.0652                  | 9.1%    | 0.563         | 2.0%       | 0.10 |
| 477        | p-SnTeSb_0.045 | 750        | 119                                   | 0.72                                           | 2.58                                      | 0.56 | 11.1%       | 2.82                    | 2.0988                  | 10.5%   | 0.565         | 2.3%       | 0.11 |
| 502        | p-SnTeSb_0.045 | 775        | 128                                   | 0.78                                           | 2.38                                      | 0.69 | 13.0%       | 3.01                    | 2.1361                  | 12.1%   | 0.567         | 2.7%       | 0.13 |

### S.3.7 Spreadsheet for the calculation of ZT for SnTeSb<sub>0.05</sub>

| $T$<br>(C) | Material      | $T$<br>(K) | Seebeck<br>( $\mu\text{V}/\text{K}$ ) | resistivity<br>( $10^{-3} \Omega \text{ cm}$ ) | thermal cond<br>( $\text{W}/\text{m K}$ ) | $zT$ | max red eff | $s$<br>( $1/\text{V}$ ) | $u$<br>( $1/\text{V}$ ) | red eff | $\phi$<br>(V) | efficiency | $ZT$  |
|------------|---------------|------------|---------------------------------------|------------------------------------------------|-------------------------------------------|------|-------------|-------------------------|-------------------------|---------|---------------|------------|-------|
| 27         | p-SnTeSb_0.05 | 300        | 17                                    | 0.15                                           | 6.94                                      | 0.01 | 0.2%        | 0.78                    | 1.8677                  | -0.2%   | 0.540         |            |       |
| 52         | p-SnTeSb_0.05 | 325        | 19                                    | 0.17                                           | 6.66                                      | 0.01 | 0.3%        | 0.87                    | 1.8721                  | -0.1%   | 0.540         | 0.0%       | -0.01 |
| 77         | p-SnTeSb_0.05 | 350        | 22                                    | 0.18                                           | 6.41                                      | 0.01 | 0.4%        | 0.95                    | 1.8768                  | 0.0%    | 0.540         | 0.0%       | 0.00  |
| 102        | p-SnTeSb_0.05 | 375        | 25                                    | 0.19                                           | 6.15                                      | 0.02 | 0.5%        | 1.04                    | 1.8825                  | 0.2%    | 0.540         | 0.0%       | 0.00  |
| 127        | p-SnTeSb_0.05 | 400        | 28                                    | 0.20                                           | 5.90                                      | 0.03 | 0.6%        | 1.14                    | 1.8891                  | 0.4%    | 0.541         | 0.0%       | 0.00  |
| 152        | p-SnTeSb_0.05 | 425        | 32                                    | 0.22                                           | 5.66                                      | 0.03 | 0.8%        | 1.26                    | 1.8968                  | 0.6%    | 0.541         | 0.0%       | 0.00  |
| 177        | p-SnTeSb_0.05 | 450        | 36                                    | 0.24                                           | 5.40                                      | 0.05 | 1.1%        | 1.38                    | 1.9057                  | 0.9%    | 0.541         | 0.1%       | 0.01  |
| 202        | p-SnTeSb_0.05 | 475        | 41                                    | 0.26                                           | 5.15                                      | 0.06 | 1.4%        | 1.50                    | 1.9159                  | 1.3%    | 0.541         | 0.1%       | 0.01  |
| 227        | p-SnTeSb_0.05 | 500        | 46                                    | 0.28                                           | 4.92                                      | 0.08 | 1.8%        | 1.63                    | 1.9276                  | 1.8%    | 0.542         | 0.2%       | 0.02  |
| 252        | p-SnTeSb_0.05 | 525        | 51                                    | 0.31                                           | 4.68                                      | 0.10 | 2.3%        | 1.76                    | 1.9409                  | 2.3%    | 0.542         | 0.3%       | 0.02  |
| 277        | p-SnTeSb_0.05 | 550        | 57                                    | 0.33                                           | 4.46                                      | 0.12 | 2.9%        | 1.88                    | 1.9560                  | 2.9%    | 0.543         | 0.4%       | 0.03  |
| 302        | p-SnTeSb_0.05 | 575        | 64                                    | 0.36                                           | 4.23                                      | 0.15 | 3.6%        | 2.01                    | 1.9730                  | 3.6%    | 0.544         | 0.6%       | 0.04  |
| 327        | p-SnTeSb_0.05 | 600        | 71                                    | 0.40                                           | 4.00                                      | 0.19 | 4.3%        | 2.13                    | 1.9921                  | 4.3%    | 0.545         | 0.8%       | 0.05  |
| 352        | p-SnTeSb_0.05 | 625        | 78                                    | 0.44                                           | 3.77                                      | 0.23 | 5.2%        | 2.26                    | 2.0136                  | 5.2%    | 0.546         | 0.9%       | 0.06  |
| 377        | p-SnTeSb_0.05 | 650        | 86                                    | 0.48                                           | 3.56                                      | 0.28 | 6.3%        | 2.38                    | 2.0376                  | 6.1%    | 0.547         | 1.2%       | 0.07  |
| 402        | p-SnTeSb_0.05 | 675        | 95                                    | 0.52                                           | 3.35                                      | 0.34 | 7.4%        | 2.50                    | 2.0645                  | 7.2%    | 0.548         | 1.4%       | 0.08  |
| 427        | p-SnTeSb_0.05 | 700        | 103                                   | 0.57                                           | 3.15                                      | 0.41 | 8.6%        | 2.62                    | 2.0946                  | 8.3%    | 0.550         | 1.7%       | 0.09  |
| 452        | p-SnTeSb_0.05 | 725        | 113                                   | 0.63                                           | 2.94                                      | 0.50 | 10.1%       | 2.74                    | 2.1282                  | 9.6%    | 0.552         | 2.0%       | 0.10  |
| 477        | p-SnTeSb_0.05 | 750        | 122                                   | 0.68                                           | 2.74                                      | 0.60 | 11.6%       | 2.87                    | 2.1657                  | 11.1%   | 0.553         | 2.3%       | 0.12  |
| 502        | p-SnTeSb_0.05 | 775        | 132                                   | 0.74                                           | 2.55                                      | 0.72 | 13.4%       | 3.02                    | 2.2075                  | 12.6%   | 0.556         | 2.7%       | 0.13  |
